# Supplementary material for: Characterizing the impact of urban emissions on regional aerosol particles: airborne measurements during the MEGAPOLI experiment
Source: Copernicus journal article supplement (doi:10.5194/acp-14-1397-2014), 2014-02-06
Supplement: Supplementary file 1 [file acp-14-1397-2014-supplement.pdf]

## Characterizing the impact of urban emissions on regional aerosol particles; Airborne measurements during the MEGAPOLI experiment.

Freney, E.J<sup>1</sup>, K.Sellegrì<sup>1</sup>, F. Canonaco<sup>2</sup>, A. Colomb<sup>1</sup>, A. Borbon<sup>3</sup>, V. Michoud<sup>3</sup>, J-F Doussin<sup>3</sup>, S. Crumeyrolle<sup>4\*</sup>, N. Amarouche<sup>5</sup>, J-M, Pichon<sup>1</sup>, T.Bourianne<sup>6</sup>, L. Gomes<sup>6</sup>, A. S. H. Prevot<sup>2</sup>, M. Beekmann<sup>3</sup>, A. Schwarzenböck<sup>1</sup>.

### Affiliations

<sup>1</sup>Laboratoire de Météorologie Physique, CNRS-Université Blaise Pascal, UMR6016, 63117, Clermont Ferrand, France

<sup>2</sup>Paul Scherrer Institute, Laboratory of Atmospheric Chemistry, 5232 Villigen PSI, Switzerland

<sup>3</sup>Laboratoire Interuniversitaire des Systemes Atmosphériques, LISA/IPSL, UMR CNRS 7583, Université Paris Est Creteil (UPEC) and Université Paris Diderot (UPD), France

<sup>4</sup>NASA Langley Research Center, Hampton, VA 23681, USA

<sup>5</sup> CNRS, Div Tech, Inst Natl Sci Univers, UPS 855, F-92195 Meudon, France

<sup>6</sup>Centre National de Recherches Météorologiques, Météo-France, Toulouse, URA1357, France

\*now at, LOA, UMR8518, CNRS – Université Lille1, Villeneuve d'Ascq, France

### Supplementary information

#### **Description MONA(Measurement Of Nitrogen on Aircraft) :**

NO, NO<sub>2</sub>, and NO<sub>y</sub> were measured, at a 30s time resolution, using the MONA (Measurement Of Nitrogen on Aircraft) instrument developed at LISA. This instrument, composed of two racks, is a unique prototype for airborne measurements and designed to fit into the French ATR-42. It comprises three similar commercial analysers: CLD780TR (ECO-PHYSICS®) which are based on ozone chemiluminescence and thus permit the measurements of NO concentrations at ppt levels (DL = 10ppt). The air is sampled, through backward facing inlets, by a vacuum pump at a flow rate of 9L.min<sup>-1</sup> (3L.min<sup>-1</sup> for each analyser). The flow rate of each analyser is controlled by a critical orifice and a system used to control the pressure of the inflow. Furthermore, an O<sub>2</sub> flow of 330mL.min<sup>-1</sup>, using pure O<sub>2</sub> cylinders (Air liquide, Alphagaz 1), allow the generation of ozone in each analyser. Finally, purified air (air pumped passing through three cartridges containing drierite®, purafil® and charcoal) is injected into the analytical system before takeoff and landing to avoid any contamination.

For the measurement of NO<sub>2</sub> concentrations, the air sampled passes through a photolytic converter (Blue light converter- MetAir®) to convert it into NO. NO<sub>y</sub> measurements are performed using another sampling line, since this one needs to be heated to avoid any loss of nitric acid (The sampling

line was heated at 60°C). Then the air sampled passes through a gold converter (8mm Inox tube cover of gold) heated at 200°C with H<sub>2</sub> as reagent to convert nitrogen species into NO. H<sub>2</sub> is generated at a flow rate of 0.5mL.min<sup>-1</sup> thanks to a heated reservoir of hydride to avoid the use of H<sub>2</sub> cylinder.

Calibrations of the three analysers were performed before and after each flight using a standard 8ppm NO/Air mixture (Crystal, Air Liquid (uncertainty:  $\pm 2\%$ )) and a clean air cylinder (Alphagaz 1, zero air at 99,99% Air Liquid) used to dilute NO concentrations (8 ml/min for NO, and 10 L/min for the zero air, which leads to a NO concentration for calibration of 6 ppbv.). Gas-Phase Titration (GPT) was used to calibrate NO<sub>2</sub>. The principle of GPT is based on the rapid gas-phase reaction between NO and O<sub>3</sub> that produces stoichiometric quantities of NO<sub>2</sub>. If the initial and final NO concentrations for this reaction are known, the resulting NO<sub>2</sub> concentration can be determined. Ozone is added to excess NO in a dynamic calibration system, and the NO channel of the chemiluminescent analyzer detects the changes in NO concentration. After the addition of O<sub>3</sub>, the observed decrease in NO concentration is equivalent to the concentration of NO<sub>2</sub> produced. The NO<sub>2</sub> generated is, then, used to calibrate both the NO<sub>2</sub> and the NO<sub>y</sub> analysers. Finally, The NO measurement uncertainty was estimated to be 10% and the NO<sub>2</sub> and NO<sub>y</sub> measurement uncertainties were estimated to be 20%.

**Supplementary figures and tables**

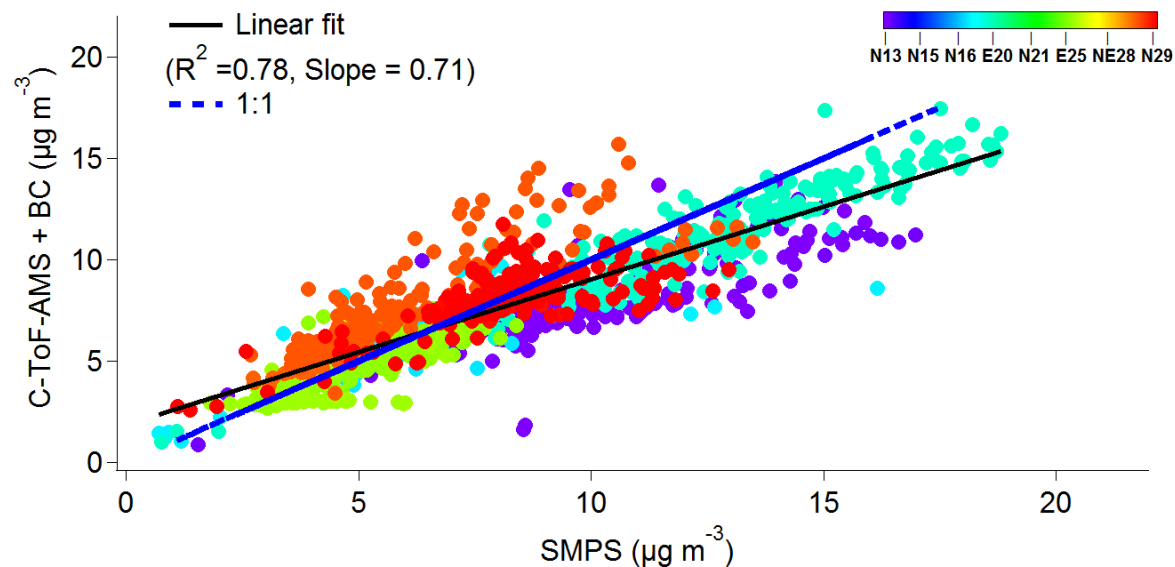

**Figure S1. Comparison between the total mass concentration of the C-ToF-AMS and SMPS for all flights. Points are coloured by flight time. The blue line shows a 1:1 fit and the black line shows the linear fit through the data points.**

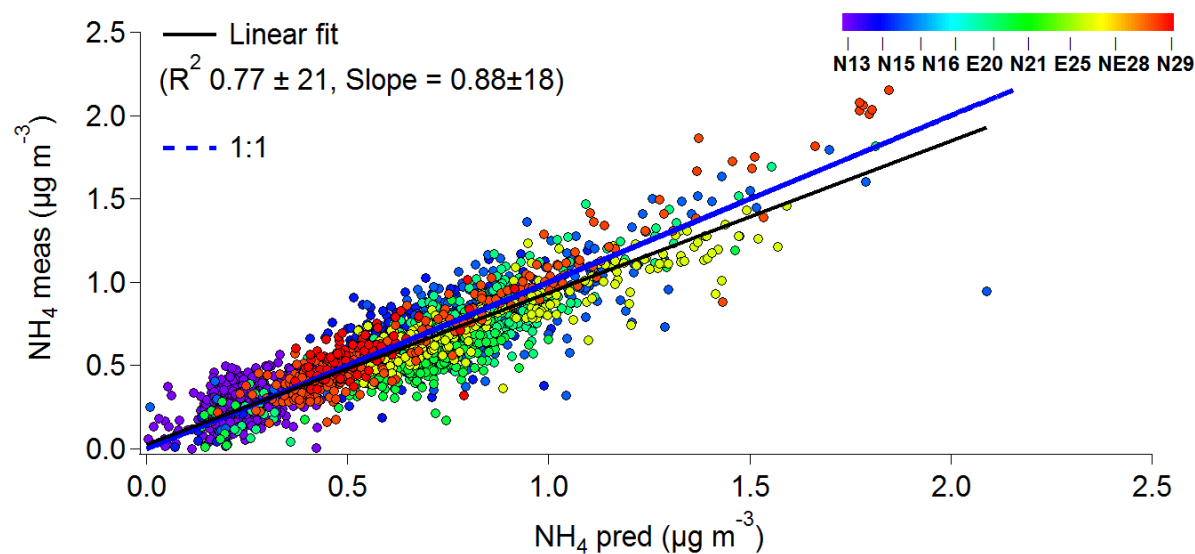

**Figure S2:  $\text{NH}_{4\text{MEAS}}$  vs  $\text{NH}_{4\text{PRED}}$  for all flights. Points are coloured by flight time. The blue line shows a 1:1 fit and the black line shows the linear fit through the data points.**

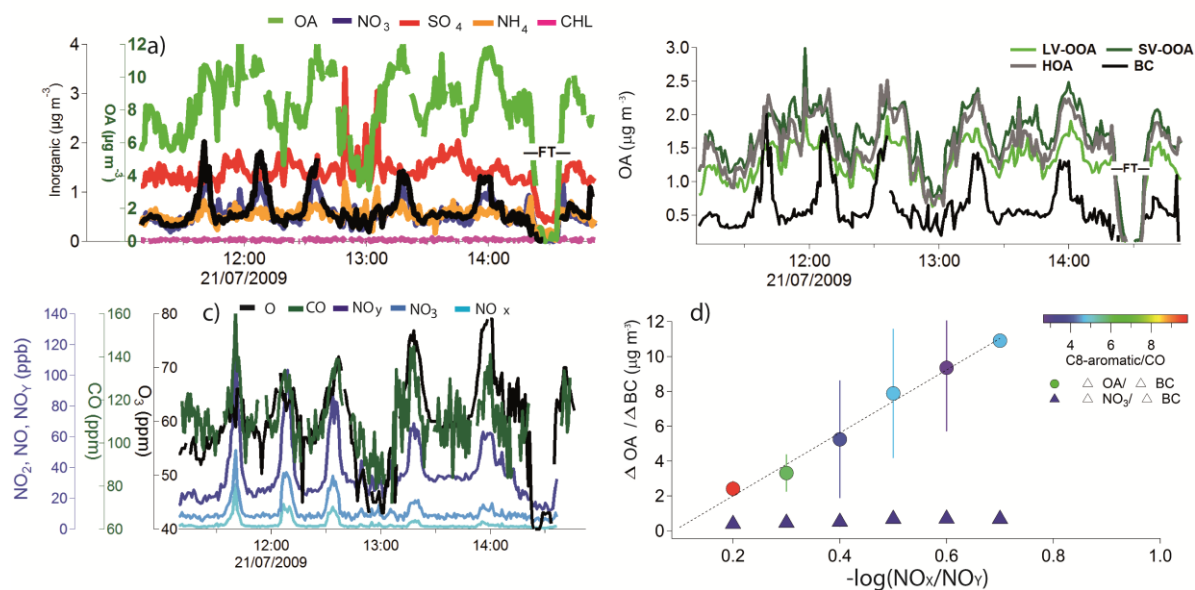

Figure S3. An overview of aerosol gas and particle composition measured during N21. a) Time series of AMS particle composition, and BC (in black). b) PMF analysis of the organic aerosol mass spectra along with BC. c) Temporal evolution of gas-phase species and d) increase in the organic aerosol mass concentration as a function of photochemical age.

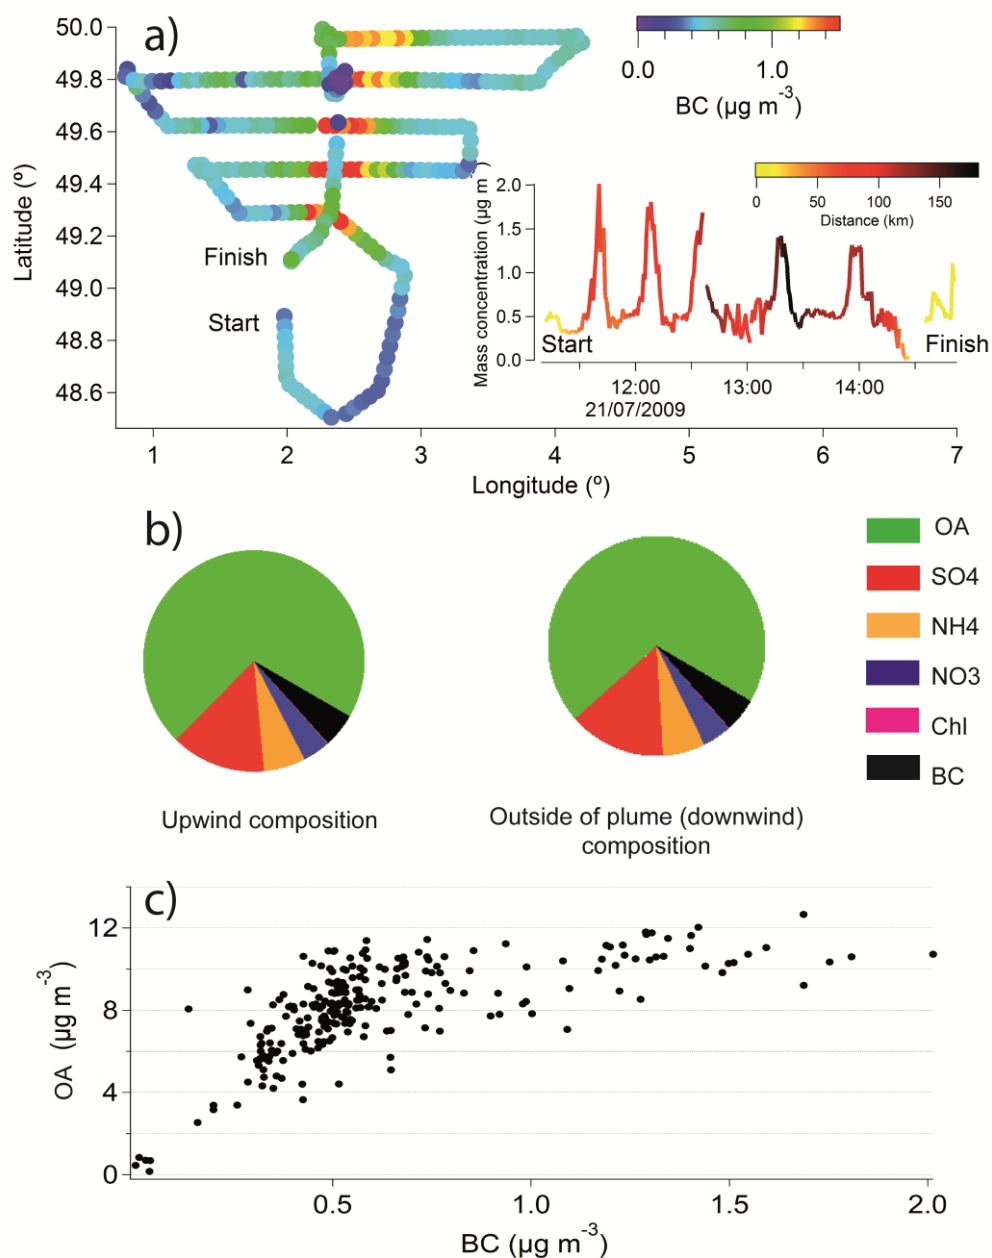

Figure S4: Average aerosol composition measured upwind of the plume area during N21 and on the sides of the plume area. Pie charts illustrate that the composition outside of the plume are representative of upwind aerosol composition.

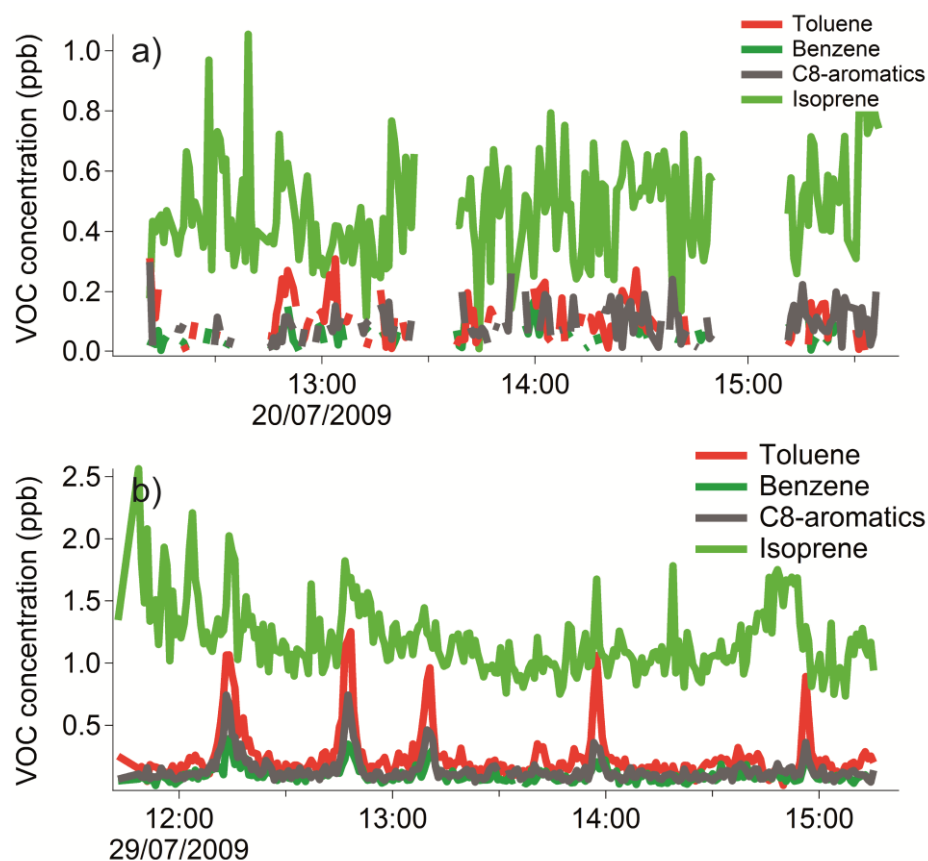

Figure S5. An example of some of the VOC species measured using PTR-MS during E20 and N29.

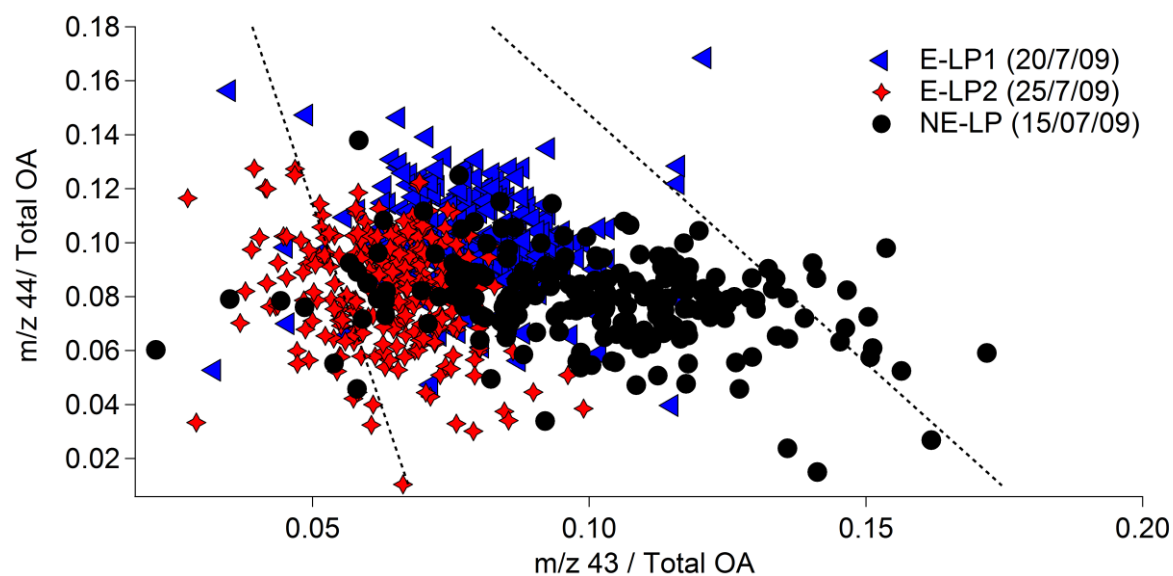

Figure S6: Fraction of Org44 to total Organics (F44) against the fraction of Org 43 to total Organics (F43) for E20, E25, and NE15. The black dotted lines show boundaries set by Ng et al., (2010).

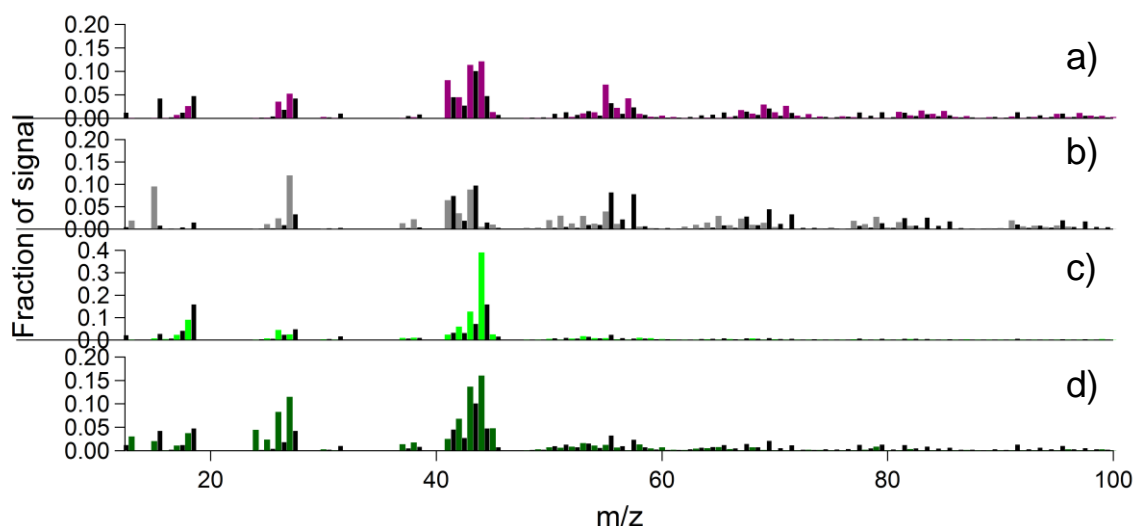

Figure. S7 Four factor PMF solution a) SV-OOA b) HOA c) LV-OOA, and d) SV-OOA1. Black mass spectra correspond to reference mass spectra for a) SV-OOA, b) HOA, c) LV-OOA, and d) SV-OOA. Reference mass spectra were taken from the AMS mass spectral data set (<http://cires.colorado.edu/jimenez-group/AMSsd/>).

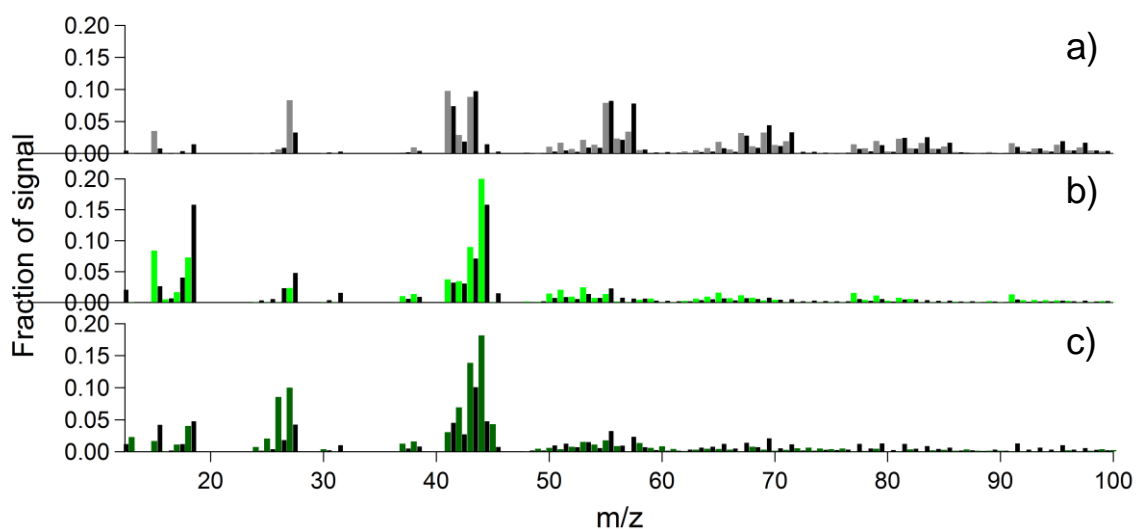

Figure. S8 Three factor PMF solution a) HOA b) LV-OOA, and c) SV-OOA. Black mass spectra correspond to reference mass spectra for a) HOA, b) LV-OOA, and c) SV-OOA. Reference mass spectra were taken from the AMS mass spectral data set (<http://cires.colorado.edu/jimenez-group/AMSsd/>).

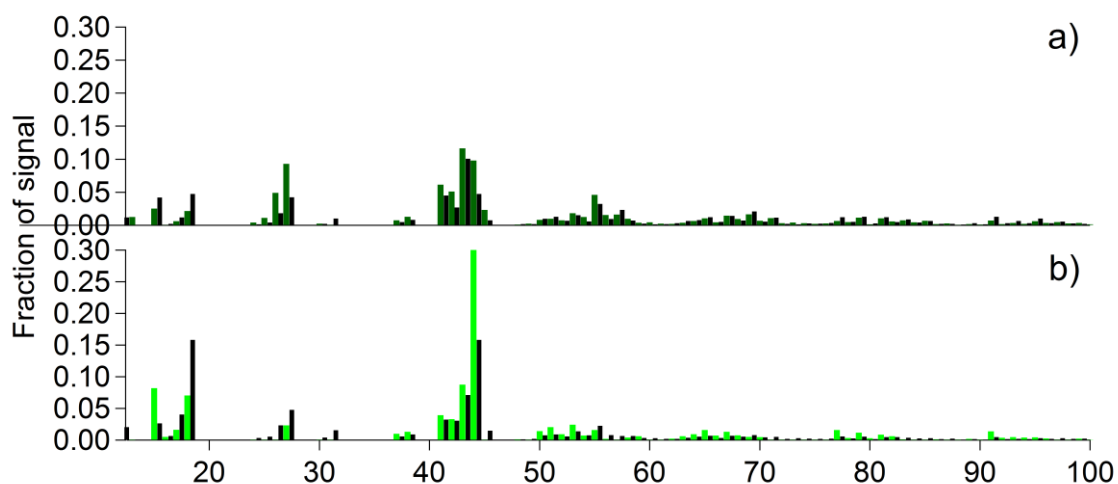

Figure. S9 Two factor PMF solution a) SV-OOA b) LV-OOA. Black mass spectra correspond to reference mass spectra for a) SV-OOA, and b) LV-OOA. Reference mass spectra were taken from the AMS mass spectral data set (<http://cires.colorado.edu/jimenez-group/AMSsd/>).

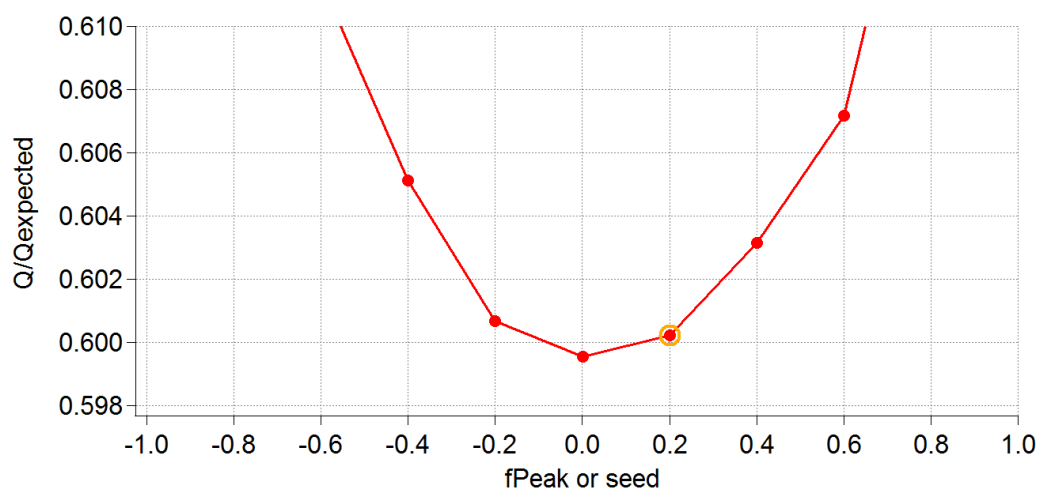

Figure S10:  $Q/Q_{\text{exp}}$  vs  $f_{\text{peak}}$  for a three factor solution.



112

113 Table S1. Research flight number, date and principal measurements available during each flight. A  
114 denotes available and N/A denotes unavailable.

| RF | Date     | C-ToF-AMS | PTR-MS | MONA | O <sub>3</sub> , CO, BC | Classification |
|----|----------|-----------|--------|------|-------------------------|----------------|
| 28 | 13/07/09 | A         | A      | N/A  | A                       | N13            |
| 29 | 15/07/09 | A         | A      | N/A  | A                       | NE15           |
| 30 | 16/07/09 | A         | N/A    | A    | A                       | N16            |
| 31 | 20/07/09 | A         | A      | A    | A                       | E20            |
| 32 | 21/07/09 | A         | A      | A    | A                       | N21            |
| 33 | 25/07/09 | A         | N/A    | A    | A                       | E25            |
| 35 | 28/07/09 | A         | N/A    | N/A  | A                       | NE28           |
| 36 | 29/07/09 | A         | A      | A    | A                       | N29            |

115

116

117

118

119

Table S2. Pearsons R ( $P_R$ ) correlation values a four factor PMF solution using a  $f_{peak} = 0$  for all flights. Reference mass spectra were taken from the AMS mass spectral data set (<http://cires.colorado.edu/jimenez-group/AMSsd/>).

| External Data                 | SV-OOA      | OOA         | LV-OOA      | HOA         |
|-------------------------------|-------------|-------------|-------------|-------------|
| CO                            | -0.03       | -0.37       | 0.19        | 0.11        |
| Ozone                         | -0.46       | -0.22       | -0.37       | -0.42       |
| NO <sub>3</sub>               | 0.34        | 0.18        | 0.28        | 0.28        |
| SO <sub>4</sub>               | 0.05        | 0.11        | 0.04        | 0.07        |
| NH <sub>4</sub>               | 0.02        | 0.19        | 0.17        | 0.19        |
| Chl                           | 0.02        | 0.1         | 0.01        | -0.06       |
| RH                            |             |             |             |             |
| Methanol                      | 0.81        | 0.59        | 0.77        | 0.82        |
| Monoterpenes                  |             |             |             |             |
| C8-aromatics                  |             |             |             |             |
| Toluene                       | <b>0.50</b> | -0.14       | <b>0.46</b> | <b>0.51</b> |
| Benzene                       | <b>0.48</b> | -0.1        | <b>0.50</b> | <b>0.53</b> |
| Isoprene                      | 0.38        | 0.04        | 0.43        | 0.34        |
| Methacrolein                  |             |             |             |             |
| Methyleketone                 |             |             |             |             |
| NO <sub>2</sub>               | 0.24        | -0.01       | 0.05        | 0.16        |
| NO                            | 0.19        | 0           | 0.01        | 0.11        |
| NO <sub>y</sub>               | 0.39        | 0.1         | 0.29        | 0.38        |
| BC                            | 0.64        | 0.08        | 0.52        | 0.61        |
| <b>Reference mass spectra</b> |             |             |             |             |
| HOA                           | 0.55        | 0.40        | 0.23        | <b>0.79</b> |
| OOA                           | 0.37        | <b>0.77</b> | <b>0.83</b> | 0.75        |
| LV-OOA                        | 0.33        | 0.74        | <b>0.84</b> | 0.69        |
| SV-OOA                        | <b>0.76</b> | 0.76        | 0.58        | <b>0.85</b> |
| BBOA                          | <b>0.74</b> | 0.67        | 0.48        | <b>0.83</b> |

132

133 Table S3. Pearsons R ( $P_R$ ) correlation values with particle and gas phase species for a three factor  
 134 PMF solution with an fpeak of 0.2 for all flights. Reference mass spectra were taken from the AMS  
 135 mass spectral data set (<http://cires.colorado.edu/jimenez-group/AMSsd/>).

| External Data                 | SV-OOA      | LV-OOA      | HOA         |
|-------------------------------|-------------|-------------|-------------|
| CO                            | -0.05       | 0.48        | 0.016       |
| Ozone                         | -0.48       | -0.34       | -0.44       |
| NO <sub>3</sub>               | <b>0.35</b> | 0.24        | 0.32        |
| SO <sub>4</sub>               | 0.1         | 0.01        | 0.06        |
| NH <sub>4</sub>               | 0.26        | 0.14        | 0.06        |
| Chl                           | 0.05        | -0.05       | -0.02       |
| RH                            |             |             |             |
| Methanol                      | 0.88        | 0.68        | 0.82        |
| Monoterpenes                  |             |             |             |
| C8-aromatics                  |             |             |             |
| Toluene                       | 0.43        | <b>0.46</b> | <b>0.52</b> |
| Benzene                       | 0.42        | <b>0.52</b> | <b>0.51</b> |
| Isoprene                      | 0.37        | 0.41        | 0.35        |
| Methacrolein                  |             |             |             |
| Metheylketone                 | 0.45        | 0.23        | 0.49        |
| NO <sub>2</sub>               | 0.12        | 0.1         | 0.23        |
| NO                            | 0.08        | 0.03        | 0.18        |
| NO <sub>y</sub>               | 0.30        | 0.32        | 0.41        |
| BC                            | 0.58        | 0.53        | <b>0.65</b> |
| <b>Reference mass spectra</b> |             |             |             |
| HOA                           | 0.41        | 0.24        | <b>0.88</b> |
| OOA                           | <b>0.80</b> | <b>0.82</b> | 0.35        |
| LV-OOA                        | <b>0.78</b> | <b>0.83</b> | 0.28        |
| SV-OOA                        | <b>0.77</b> | 0.63        | <b>0.78</b> |
| BBOA                          | 0.68        | 0.53        | 0.81        |

136

137

138

139

140

141

142

143

Table S4. Pearsons R ( $P_R$ ) correlation values with particle and gas phase species for a two factor PMF solution with an fpeak of 0.2 for all flights. Reference mass spectra were taken from the AMS mass spectral data set (<http://cires.colorado.edu/jimenez-group/AMSsd/>).

| External Data                 | SV-OOA      | LV-OOA      |
|-------------------------------|-------------|-------------|
| CO                            | 0.25        | -0.02       |
| Ozone                         | -0.33       | -0.47       |
| NO <sub>3</sub>               | 0.24        | 0.34        |
| SO <sub>4</sub>               | 0.01        | 0.08        |
| NH <sub>4</sub>               | 0.14        | 0.08        |
| Chl                           | -0.06       | 0.01        |
| RH                            |             |             |
| Methanol                      | 0.70        | 0.86        |
| Monoterpenes                  |             |             |
| C8-aromatics                  |             |             |
| Toluene                       | 0.47        | 0.49        |
| Benzene                       | 0.53        | 0.48        |
| Isoprene                      | 0.41        | 0.36        |
| Methacrolein                  |             |             |
| Metheylketone                 |             |             |
| NO <sub>2</sub>               | 0.08        | 0.37        |
| NO                            | 0.03        | 0.18        |
| NO <sub>y</sub>               | 0.32        | 0.37        |
| BC                            | 0.54        | <b>0.63</b> |
| <b>Reference mass spectra</b> |             |             |
| HOA                           | 0.68        | 0.25        |
| OOA                           | 0.74        | <b>0.82</b> |
| LV-OOA                        | 0.69        | <b>0.83</b> |
| SV-OOA                        | <b>0.90</b> | 0.63        |
| BBOA                          | <b>0.87</b> | 0.54        |

Table S5: Pearsons R ( $P_R$ ) correlation values with particle and gas phase species for a three factor PMF solution at fpeak values of -0.2, 0, and 0.2 for all flights. Reference mass spectra were taken from the AMS mass spectral data set (<http://cires.colorado.edu/jimenez-group/AMSsd/>).

| fpeak           | fpeak = 0.2 |             |             | fpeak = 0   |             |             | fpeak = -0.2 |             |             |
|-----------------|-------------|-------------|-------------|-------------|-------------|-------------|--------------|-------------|-------------|
|                 | SV-OOA      | LV-OOA      | HOA         | SV-OOA      | LV-OOA      | HOA         | SV-OOA       | LV-OOA      | HOA         |
| CO              | -0.05       | 0.25        | 0.02        | -0.46       | 0.20        | -0.01       | -0.42        | 0.22        | -0.03       |
| Ozone           | -0.48       | -0.33       | -0.45       | -0.31       | -0.37       | -0.45       | -0.25        | -0.34       | -0.40       |
| NO <sub>3</sub> | 0.35        | 0.24        | 0.32        | 0.27        | 0.27        | 0.31        | 0.21         | 0.25        | 0.27        |
| SO <sub>4</sub> | 0.10        | 0.01        | 0.06        | 0.14        | 0.04        | 0.06        | 0.11         | 0.05        | 0.03        |
| NH <sub>4</sub> | 0.26        | 0.14        | 0.21        | 0.26        | 0.16        | 0.21        | 0.21         | 0.16        | 0.17        |
| Chl             | 0.05        | -0.06       | -0.03       | 0.14        | -0.02       | -0.03       | 0.12         | 0.00        | -0.07       |
| Methanol        | 0.88        | 0.68        | 0.82        | 0.77        | 0.77        | 0.79        | 0.69         | 0.69        | 0.64        |
| Toluene         | <u>0.43</u> | <u>0.46</u> | <u>0.52</u> | -0.04       | 0.47        | <u>0.51</u> | -0.11        | 0.42        | <u>0.52</u> |
| Benzene         | <u>0.42</u> | <u>0.52</u> | <u>0.51</u> | 0.01        | 0.53        | <u>0.50</u> | -0.06        | 0.47        | <u>0.49</u> |
| Isoprene        | <u>0.37</u> | <u>0.41</u> | 0.35        | 0.02        | 0.41        | 0.32        | -0.02        | 0.41        | 0.25        |
| NO              | 0.08        | 0.03        | 0.18        | 0.08        | 0.03        | 0.22        | 0.03         | -0.03       | 0.31        |
| NO <sub>2</sub> | 0.12        | 0.07        | 0.23        | 0.10        | 0.07        | 0.27        | 0.04         | 0.02        | 0.35        |
| NO <sub>y</sub> | 0.30        | 0.32        | 0.41        | 0.01        | 0.31        | <u>0.43</u> | -0.06        | 0.26        | <u>0.48</u> |
| BC              | <u>0.58</u> | 0.53        | <u>0.65</u> | 0.21        | <u>0.54</u> | <u>0.66</u> | 0.12         | 0.48        | <u>0.65</u> |
|                 |             |             |             |             |             |             |              |             |             |
|                 | SV-OOA      | LV-OOA      | HOA         | SV-OOA      | LV-OOA      | HOA         | SV-OOA       | LV-OOA      | HOA         |
| HOA             | 0.41        | 0.24        | <u>0.88</u> | 0.43        | 0.39        | <u>0.87</u> | 0.57         | 0.47        | 0.74        |
| OOA             | <u>0.80</u> | 0.82        | 0.35        | <u>0.80</u> | <u>0.86</u> | 0.51        | 0.78         | <u>0.86</u> | 0.74        |
| LVOOA           | 0.78        | <u>0.83</u> | 0.28        | 0.77        | <u>0.85</u> | 0.44        | 0.74         | <u>0.84</u> | 0.69        |
| SVOOA           | 0.77        | 0.63        | 0.78        | <u>0.79</u> | 0.77        | <u>0.86</u> | <u>0.86</u>  | 0.81        | <u>0.92</u> |
| BBOA            | 0.68        | 0.53        | <u>0.81</u> | 0.71        | 0.67        | <u>0.88</u> | <u>0.80</u>  | 0.73        | <u>0.89</u> |

Table S6. Yields used for the prediction of the formation of secondary organic aerosol.

|              | Low NOx yield | High NOx Yield |                                    |
|--------------|---------------|----------------|------------------------------------|
| Benzene      | 0.37          | 0.08           | Ng et al., 2007                    |
| Toluene      | 0.3           | 0.281          | Ng et al., 2007                    |
| C8-aromatics | 0.36          | 0.035          | yield of m-xylene (Ng et al, 2007) |
| C9-aromatics | 0.36          | 0.035          | yield of m-xylene (Ng et al, 2007) |
